# Supplementary material for: A Modified EpiSC Culture Condition Containing a GSK3 Inhibitor Can Support Germline-Competent Pluripotency in Mice
Source: PubMed Central journal article supplement (PMC3988182; doi:10.1371/journal.pone.0095329), 2014-04-15
Supplement: pone.0095329.s001.pdf [file pone.0095329.s001.pdf]

Figure S1 Expression of OCT3/4 and FOXA2

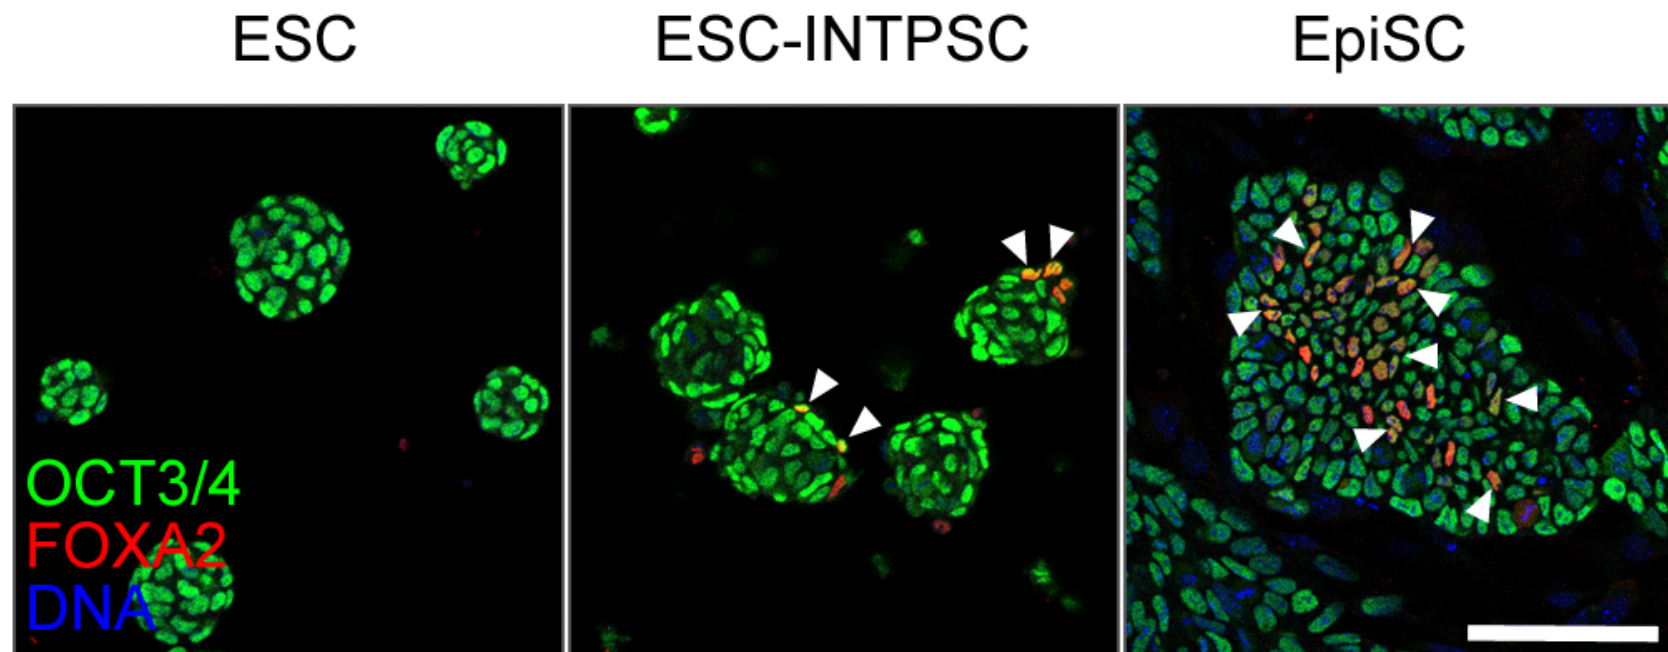

White arrows indicate OCT3/4- and FOXA2-double-positive cells.

Scale bar, 100  $\mu$ m.
